# Supplementary material for: Active Confinement of Masonry Walls with Stainless Steel Straps: The Effect of Strap Arrangement on the in-Plane Behavior of Strength, Poisson’s Ratio, and Pseudo-Ductility
Source: MDPI journal article supplement (doi:10.3390/buildings13123027), 2023-12-05
Supplement: s1 [file s1]

Archive with 1 entries (1 files):
- buildings-2707993-supplementary.pdf
