# Supplementary material for: Active Confinement of Masonry Walls with Stainless Steel Straps: The Effect of Strap Arrangement on the in-Plane Behavior of Strength, Poisson’s Ratio, and Pseudo-Ductility
Source: MDPI journal article supplement (doi:10.3390/buildings13123027), 2023-12-05
Supplement: s1 [file s1 › buildings-2707993-supplementary.pdf]

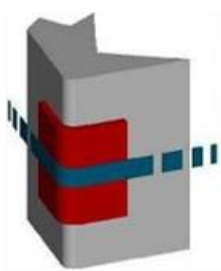

(a)

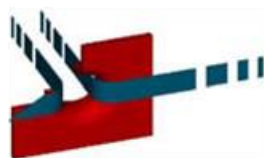

(b)

**Figure S1.** Special stainless steel elements for masonry protection: (a) Along the edges at wall ends (rounded angles); (b) Along the edges generated by the perforations (funnel plates).

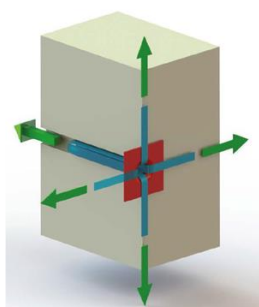

**Figure S2.** Four stainless steel straps of the CAM® System sharing the same perforation.

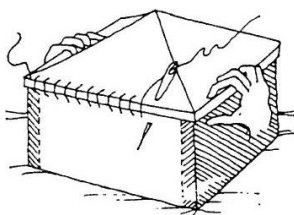

**Figure S3.** Box-type behavior: by tying all the construction elements together, the building behaves as a single unit.

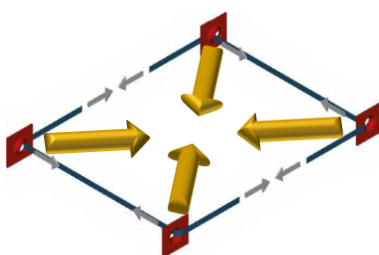

**Figure S4.** Stress transfer mechanism from a loop-shaped stainless steel strap placed in tension to the masonry enclosed within it.
